# Supplementary material for: Sorafenib and indocyanine green co-loaded in photothermally sensitive liposomes for diagnosis and treatment of advanced hepatocellular carcinoma
Source: Royal Society of Chemistry journal article supplement (doi:10.1039/c8tb01641k), 2018-01-01
Supplement: c8tb01641k1.pdf [file c8tb01641k1.pdf]

## Supporting Information

### Sorafenib and indocyanine green co-loaded in photothermally sensitive liposomes for diagnosis and treatment of advanced HCC

Qianyuan He<sup>1\*</sup>, Xiaoxiao He<sup>3\*</sup>, Bin Deng<sup>4</sup>, Chen Shi<sup>4</sup>, Leping Lin<sup>1</sup>, Pei Liu<sup>1</sup>, Zhe Yang<sup>1</sup>, Shengli Yang<sup>\*\*2</sup>, Zushun Xu<sup>\*\*1</sup>

1. Hubei Collaborative Innovation Center for Advanced Organic Chemical Materials; Ministry of Education Key Laboratory for The Green Preparation and Application of Functional Material, Hubei University, Wuhan, Hubei 430062, China

2. Cancer Center, Union Hospital, Tongji Medical College, Huazhong University of Science and Technology, Wuhan 430022, China

3. Division of Gastroenterology, Liyuan Hospital Tongji Medical College, Huazhong University of Science and Technology, Wuhan 430077, China

Department of Pharmacy, Union Hospital, Tongji Medical College, Huazhong University of Science and Technology, Wuhan 430022, China

\* Qianyuan He and Xiaoxiao He contributed equally to this work.

\*\* Corresponding author

E-mail addresses: [zushunxu@hubu.edu.cn](mailto:zushunxu@hubu.edu.cn), [yangshengli2014@yahoo.com](mailto:yangshengli2014@yahoo.com)

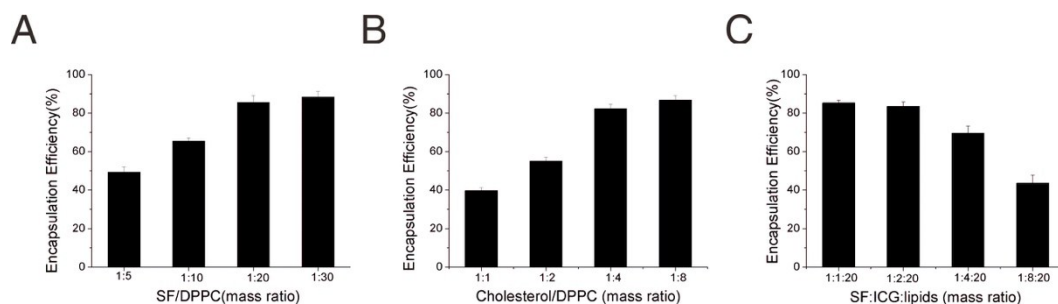

Figure S1. (A) Effects of SF to DPPC mass ratio on the encapsulation efficiency. (B) Effects of Cholesterol to DPPC mass ratio on the encapsulation efficiency. (C) Effects of SF, ICG to lipids mass ratio on the encapsulation efficiency.

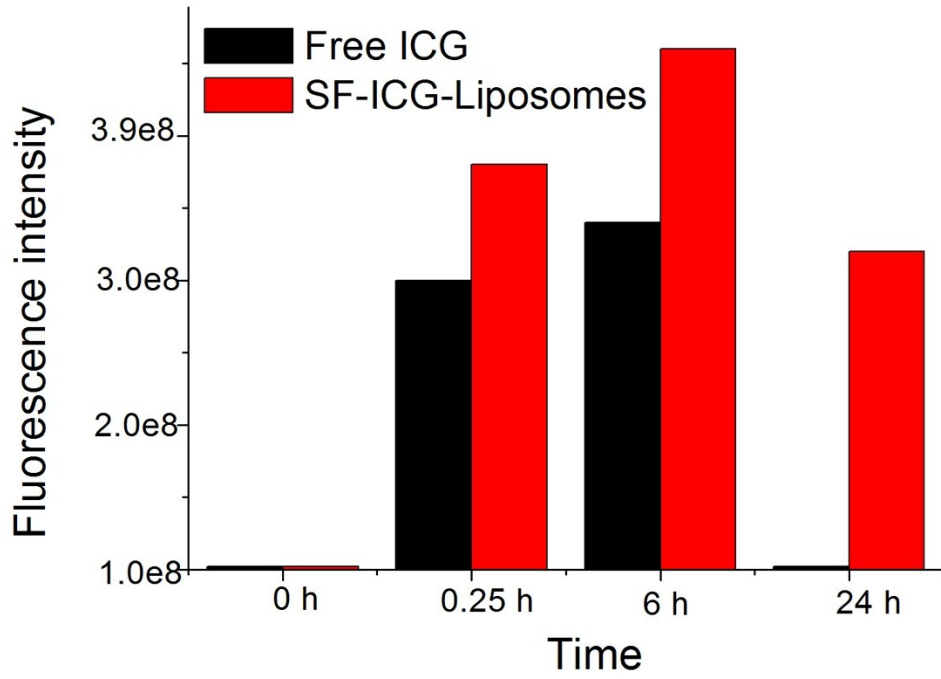

Figure S2. The fluorescence intensity of tumor at different time point.

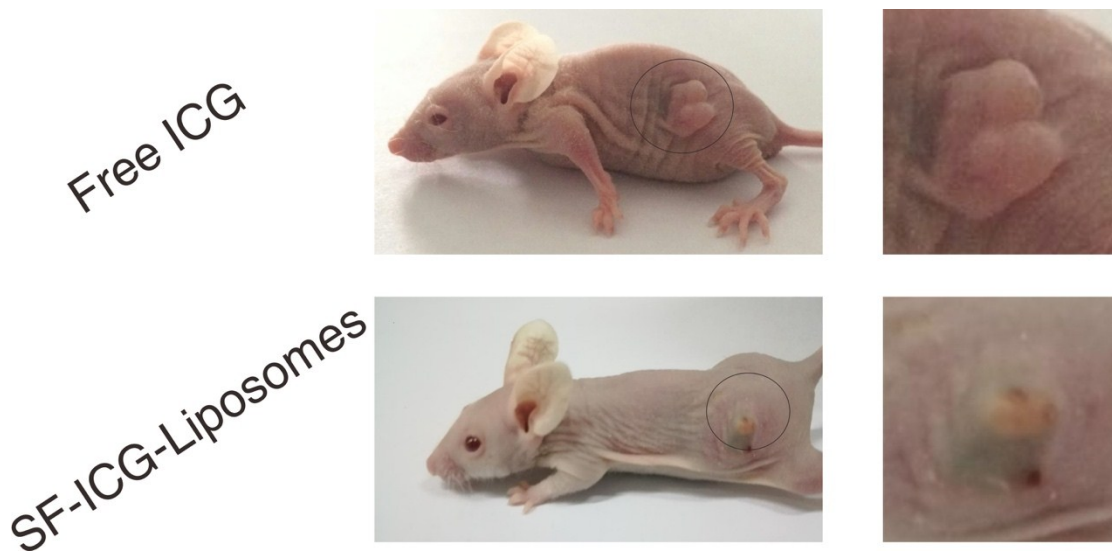

Figure S3. Representative photographs of tumor-bearing nude mice after 12 h postinjection.(Free ICG and SILs)

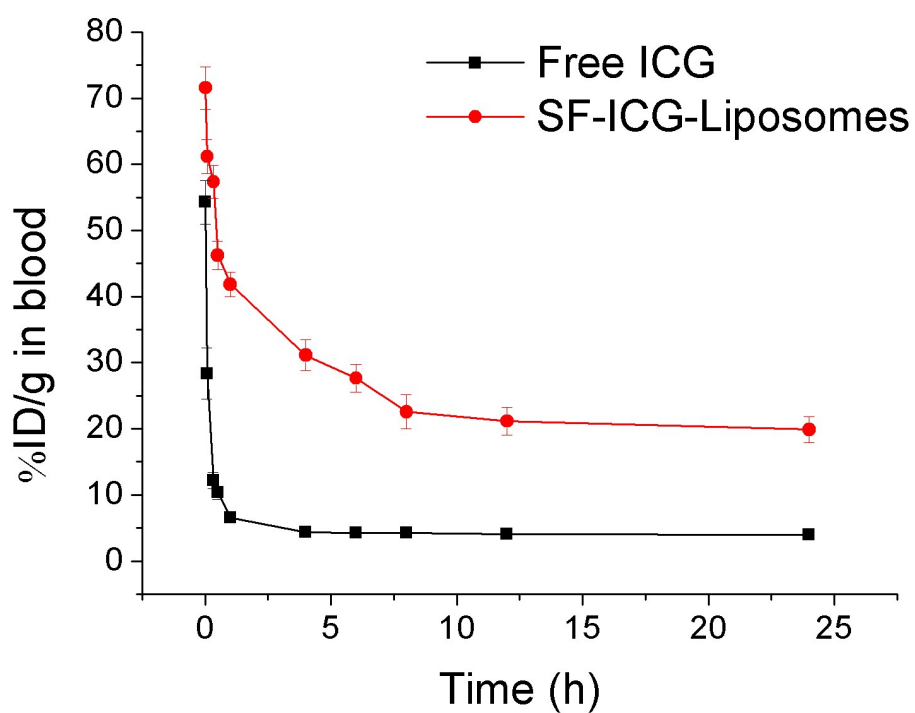

Figure S4. Blood circulation curve of free ICG and SILs.

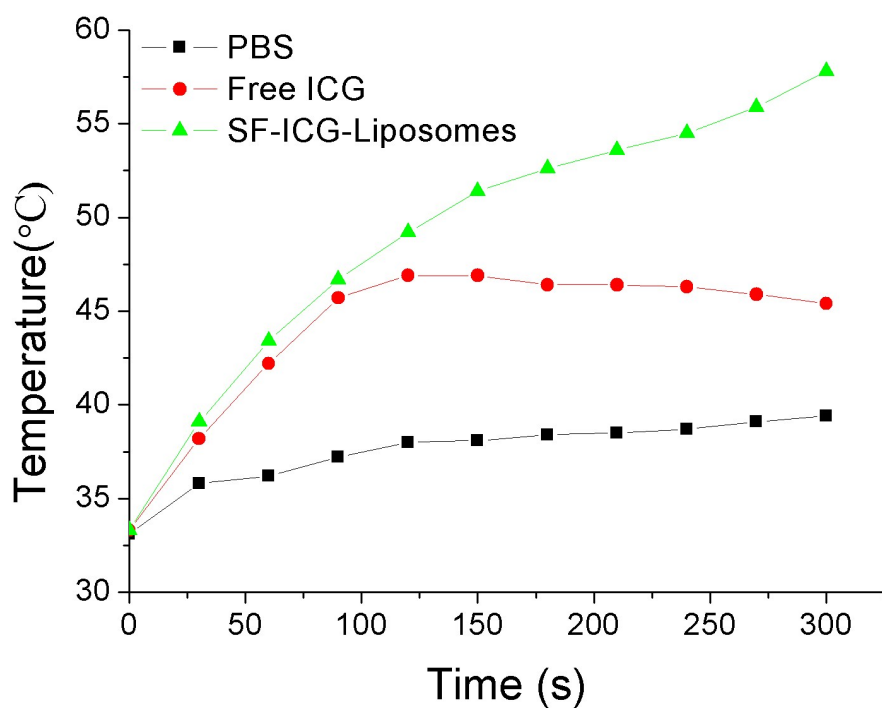

Figure S5. Temperature changes after irradiation in different post injection time point.

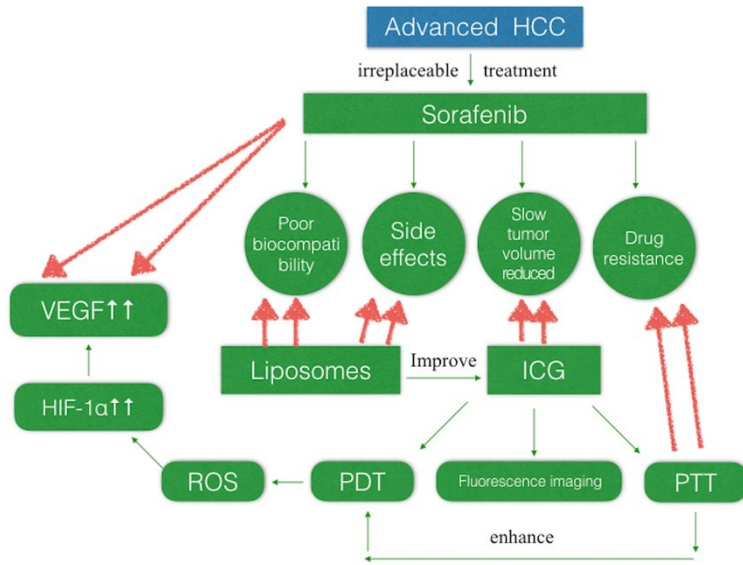

Figure S6. The summary of SF-ICG-Liposomes theranostic system for advanced HCC.
